# Supplementary material for: A full spectral analysis method for the gamma spectrum: weighted library least squares
Source: Royal Society of Chemistry journal article supplement (doi:10.1039/d1ay01319j), 2021-01-01
Supplement: d1ay01319j1.xlsx [file d1ay01319j1.xlsx]

## Sheet: Sheet1
The mass percentage of elements in samples.
Samples	Fe	Al	Ca	Si	Mg	K	C	O
1	0.0069	0.0038	0.28	0.0399	0.0059	0.0008	0.2658	0.3923
2	0.008	0.0058	0.2838	0.0416	0.0071	0.0014	0.2451	0.4023
3	0.0091	0.0078	0.2885	0.0434	0.0082	0.0019	0.2227	0.4133
4	0.0113	0.0119	0.2968	0.047	0.0094	0.0025	0.1827	0.4331
5	0.0102	0.0099	0.2926	0.0452	0.0106	0.003	0.1984	0.4248
6	0.0178	0.0038	0.28	0.0651	0.0117	0.0036	0.181	0.4313
7	0.0091	0.0058	0.322	0.0506	0.0129	0.0041	0.1257	0.4644
8	0.0123	0.0143	0.3008	0.0488	0.014	0.0008	0.1588	0.4445
9	0.008	0.0038	0.3178	0.0488	0.0152	0.0041	0.1404	0.4565
10	0.0069	0.0201	0.3136	0.0469	0.0175	0.0008	0.1253	0.4629
11	0.0189	0.0058	0.2842	0.0669	0.0117	0.003	0.1632	0.4404
12	0.0134	0.016	0.3052	0.0506	0.0129	0.0036	0.1377	0.4548
13	0.0102	0.0078	0.3258	0.0524	0.0163	0.0036	0.1109	0.467
14	0.02	0.0078	0.2884	0.0687	0.0071	0.0036	0.1516	0.4471
15	0.0167	0.0038	0.3178	0.056	0.0152	0.0014	0.1167	0.4669
16	0.0266	0.0038	0.28	0.0724	0.0059	0.0041	0.1617	0.4399
17	0.0156	0.0201	0.3133	0.0542	0.0117	0.0036	0.1083	0.4671
18	0.0112	0.0099	0.3299	0.0542	0.0083	0.0041	0.1103	0.4661
19	0.0145	0.018	0.3094	0.0524	0.0163	0.0008	0.1177	0.4648
20	0.0222	0.0119	0.2966	0.0723	0.014	0.003	0.1048	0.4688
21	0.0211	0.0099	0.2926	0.0705	0.0117	0.0014	0.1286	0.4581
22	0.0178	0.0058	0.3217	0.0578	0.0082	0.003	0.1113	0.4686
23	0.0288	0.0078	0.2884	0.0759	0.0105	0.0025	0.1192	0.4607
24	0.0277	0.0058	0.2842	0.0741	0.0105	0.0036	0.1361	0.452
25	0.0134	0.014	0.3376	0.0578	0.0106	0.0025	0.1015	0.4554
26	0.0123	0.0119	0.3337	0.056	0.0129	0.0019	0.1048	0.4596
27	0.0277	0.0038	0.3178	0.0397	0.0059	0.0025	0.1502	0.4476
28	0.0233	0.014	0.3006	0.0741	0.0106	0.0025	0.1025	0.466
29	0.02	0.0099	0.3295	0.0614	0.0094	0.0019	0.1028	0.4582
30	0.0189	0.0078	0.3257	0.0596	0.0071	0.0019	0.1081	0.4648
31	0.0299	0.0099	0.2923	0.0777	0.0152	0.0019	0.1011	0.4654
32	0.0332	0.016	0.3052	0.0415	0.0163	0.0041	0.1223	0.4556
33	0.0145	0.016	0.3414	0.0596	0.013	0.003	0.0961	0.4483
34	0.0288	0.0058	0.322	0.0415	0.0094	0.0019	0.1265	0.4589
35	0.0244	0.016	0.3045	0.0759	0.0083	0.0036	0.099	0.4613
36	0.0321	0.0139	0.301	0.0397	0.0059	0.0041	0.1586	0.4394
37	0.0211	0.0119	0.3332	0.0632	0.0153	0.0025	0.0958	0.4491
38	0.031	0.0119	0.2966	0.0796	0.0071	0.0014	0.1003	0.4656
39	0.0156	0.018	0.3453	0.0614	0.0141	0.0025	0.0916	0.4428
40	0.0266	0.0201	0.3122	0.0795	0.0118	0.0009	0.09	0.4507
41	0.0343	0.018	0.3094	0.0433	0.0082	0.0014	0.1219	0.458
42	0.031	0.0099	0.3296	0.0469	0.0152	0.0008	0.1048	0.4553
43	0.0299	0.0078	0.3259	0.0433	0.0094	0.0014	0.1125	0.4644
44	0.0255	0.018	0.3081	0.0777	0.0176	0.003	0.0908	0.451
45	0.0222	0.014	0.3373	0.065	0.0072	0.0019	0.0956	0.449
46	0.0167	0.0201	0.3491	0.0632	0.0165	0.002	0.0865	0.4365
47	0.0321	0.0119	0.3333	0.0487	0.0176	0.003	0.0989	0.4471
48	0.0244	0.0181	0.3449	0.0687	0.0142	0.0009	0.0844	0.4352
49	0.0233	0.016	0.3409	0.0669	0.0141	0.0025	0.0881	0.4393
50	0.0332	0.014	0.3374	0.0505	0.0095	0.003	0.0984	0.4466
51	0.0255	0.0201	0.3487	0.0705	0.013	0.0042	0.0797	0.4283
52	0.0343	0.016	0.3411	0.0524	0.0176	0.0014	0.0911	0.4378
Min	0.0069	0.0038	0.28	0.0397	0.0059	0.0008	0.0797	0.3923
Max	0.0343	0.0201	0.3491	0.0796	0.0176	0.0042	0.2658	0.4688
Mean	0.0205673	0.0116538	0.313802	0.0580962	0.01165	0.00247885	0.125537	0.44971
